# Supplementary material
Source: MDPI journal article supplement (https://www.mdpi.com/2071-1050/11/19/5235)
Supplement: s1 [file s1]

Supplementary Material:

Table S1. Five examples on how the cell biovolume of different taxa were estimated.

| Taxon               | Example Picture and Measurements under the Microscope                               | Formula for Estimation of Cell Volume                                                                                                   |
|---------------------|-------------------------------------------------------------------------------------|-----------------------------------------------------------------------------------------------------------------------------------------|
| <i>Peridinium</i>   | 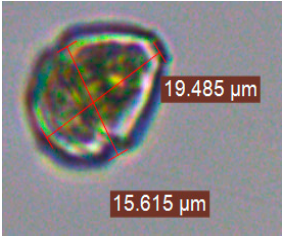   |  $V = \frac{4 \cdot \pi}{3} \cdot a \cdot b \cdot c$ |
| <i>Mougeotia</i>    |   | $V = \pi r^2 h$                                     |
| <i>Fragilaria</i>   |  |  $V = \frac{\pi d^2 h}{6}$ <p>Elliptical Cone</p>  |
| <i>Chroococcus</i>  |  |  <p>Volume of Sphere</p> $= \frac{4}{3} \pi r^3$    |
| <i>Asterionella</i> |  | $V = \pi r^2 h$                                    |
